# Supplementary material for: Cystic Fibrosis Clinical Isolates of Aspergillus fumigatus Induce Similar Muco-inflammatory Responses in Primary Airway Epithelial Cells
Source: MDPI journal article supplement (doi:10.3390/pathogens10081020), 2021-08-13
Supplement: s1 [file s1]

**Table S1: Identification using MALDI-TOF MS biotyper based on Bruker's broth-extraction method.**

| Isolate ID    | Grade    | Organism<br>(best match)         | Log score | Organism<br>(second best<br>match) | Log score |
|---------------|----------|----------------------------------|-----------|------------------------------------|-----------|
| ATCC (#46645) | (+++ (A) | <i>Aspergillus<br/>fumigatus</i> | 2.443     | <i>Aspergillus<br/>fumigatus</i>   | 2.438     |
| CFA001        | (+++ (A) | <i>Aspergillus<br/>fumigatus</i> | 2.366     | <i>Aspergillus<br/>fumigatus</i>   | 2.143     |
| CFA002        | (+++ (A) | <i>Aspergillus<br/>fumigatus</i> | 2.347     | <i>Aspergillus<br/>fumigatus</i>   | 2.280     |
| CFA003        | (+++ (A) | <i>Aspergillus<br/>fumigatus</i> | 2.123     | <i>Aspergillus<br/>fumigatus</i>   | 2.134     |
| CFA004        | (+++ (A) | <i>Aspergillus<br/>fumigatus</i> | 2.479     | <i>Aspergillus<br/>fumigatus</i>   | 2.396     |
| CFA005        | (+++ (A) | <i>Aspergillus<br/>fumigatus</i> | 2.453     | <i>Aspergillus<br/>fumigatus</i>   | 2.449     |
| CFA006        | (+++ (A) | <i>Aspergillus<br/>fumigatus</i> | 2.447     | <i>Aspergillus<br/>fumigatus</i>   | 2.319     |
| CFA007        | (+++ (A) | <i>Aspergillus<br/>fumigatus</i> | 2.337     | <i>Aspergillus<br/>fumigatus</i>   | 2.246     |
| CFA008        | (+++ (A) | <i>Aspergillus<br/>fumigatus</i> | 2.405     | <i>Aspergillus<br/>fumigatus</i>   | 2.111     |
| CFA009        | (+++ (A) | <i>Aspergillus<br/>fumigatus</i> | 2.518     | <i>Aspergillus<br/>fumigatus</i>   | 2.473     |
| CFA010        | (+++ (A) | <i>Aspergillus<br/>fumigatus</i> | 2.491     | <i>Aspergillus<br/>fumigatus</i>   | 2.318     |
| Inv1          | (+++ (A) | <i>Aspergillus<br/>fumigatus</i> | 2.298     | <i>Aspergillus<br/>fumigatus</i>   | 2.136     |
| Inv2          | (+++ (A) | <i>Aspergillus<br/>fumigatus</i> | 2.461     | <i>Aspergillus<br/>fumigatus</i>   | 2.322     |
| NEG           | (-) (C)  | No peaks<br>found                | < 0       | No peaks<br>found                  | < 0       |

First and second-best organism matches were referenced by the MBT Filamentous Fungi Library 2.0 (Bruker, Bremen, Germany). Each isolate was assessed in duplicate, with the first replicate reported here. Results were interpreted using a traffic light phenomenon - log scores between 2.00 - 3.00 reflect an 'A' grade (+++) and high probability of species' identification, and scores < 1.70 (-) are denoted by a 'C' grade depicting no similarity to any organism in the database. ATCC: *Aspergillus fumigatus* QC reference strain; NEG = uninoculated spot with Formic acid and matrix added.

**Table S2: ITS gene sequencing results for isolate identification.**

| Cluster | Fungal identification                 | Sequences producing the most significant alignment                                                                                    | Blast score (bits) | Sequence identifier on GenBank (GI) | Percentage (%) identity | Query sequences                                   |
|---------|---------------------------------------|---------------------------------------------------------------------------------------------------------------------------------------|--------------------|-------------------------------------|-------------------------|---------------------------------------------------|
| A       | <i>Aspergillus fumigatus</i> S10      | Small ribosomal RNA gene partial sequence; internal transcribed spacer 1, 5.8S ribosomal RNA gene, and internal transcribed spacer 2, | 1081               | MK267448.1                          | 100                     | ATCC, CFA001, 002, 004, 005, 006, 010, Inv1, Inv2 |
| B       | <i>Aspergillus</i> spp. isolate CK392 | complete sequence; and large subunit ribosomal RNA gene, partial sequence.                                                            | 1103               | MK439477.1                          | 100                     | CFA007, 008, 009                                  |
| C       | <i>Aspergillus fumigatus</i> strain I |                                                                                                                                       | 1098               | MK791667.1                          | 100                     | CFA003                                            |

Sequences were analysed on the National Centre for Biotechnology Information (NCBI) Library using a standard nucleotide 'BLAST' algorithm, where a 'MegaBLAST' was performed optimising highly similar sequences with reference to the GenBank database (NCBI, USA). The top result exhibiting the highest percentage identity was exported onto MEGA X Software (MEGA: Molecular Evolutionary Genetics Analysis, University Park, PA, US) [1].

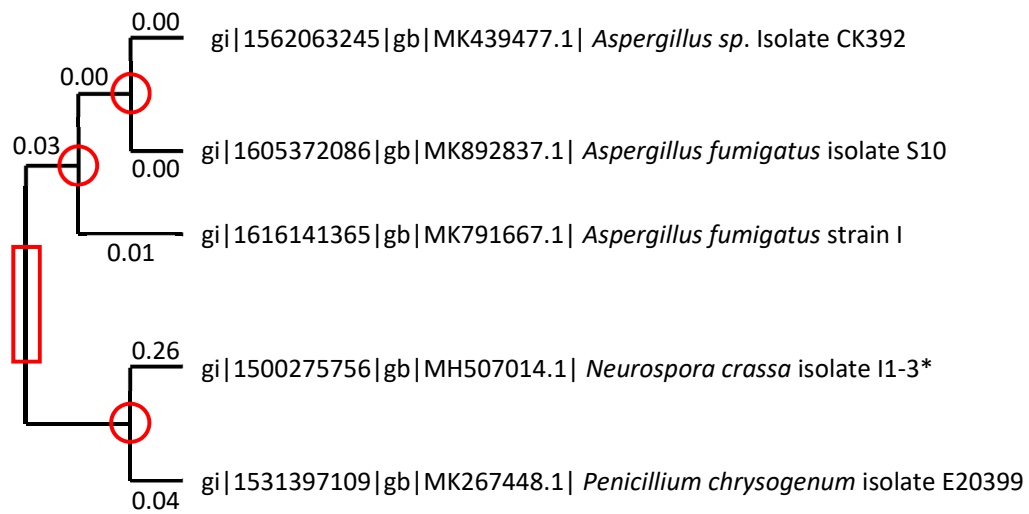

**Figure S1: Neighbour-joining phylogenetic tree based on fungal species identified in the GenBank reference database.** The sequencing alignments from the species identifications produced by the GenBank database were used to construct a neighbour-joining phylogenetic tree where the evolutionary distances were calculated using the Maximum Composite Likelihood method and bootstrapping with 500 replicates. \* *Neurospora crassa* – ITS gene sequence used as control for reference of relatedness between the strains of interest. Ancestral nodes (circled, red); phylogenetic root (squared, red); gi = sequence identifier; gb = GenBank.

## Reference

1. Kumar, S.; Stecher, G.; Li, M.; Knyaz, C.; Tamura, K. MEGA X: Molecular Evolutionary Genetics Analysis across Computing Platforms. *Mol. Biol. Evol.* **2018**, *35*, 1547–1549, doi:10.1093/molbev/msy096.
